# Supplementary material for: Nuclear hormone receptors promote gut and glia detoxifying enzyme induction and protect C. elegans from the mold P. brevicompactum
Source: PubMed Central journal article supplement — Cell Rep. Author manuscript; Available in PMC 2022 Jan 6. (PMC8733895; doi:10.1016/j.celrep.2021.110166), 2021-12-28
Supplement: NIHMS1767652-supplement-1.pdf [file NIHMS1767652-supplement-1.pdf]

Cell Reports, Volume 37

## Supplemental information

**Nuclear hormone receptors promote gut  
and glia detoxifying enzyme induction and protect  
*C. elegans* from the mold *P. brevicompactum***

Sean W. Wallace, Malcolm C. Lizzappi, Elif Magemizoğlu, Hong Hur, Yupu Liang, and Shai Shaham

**A**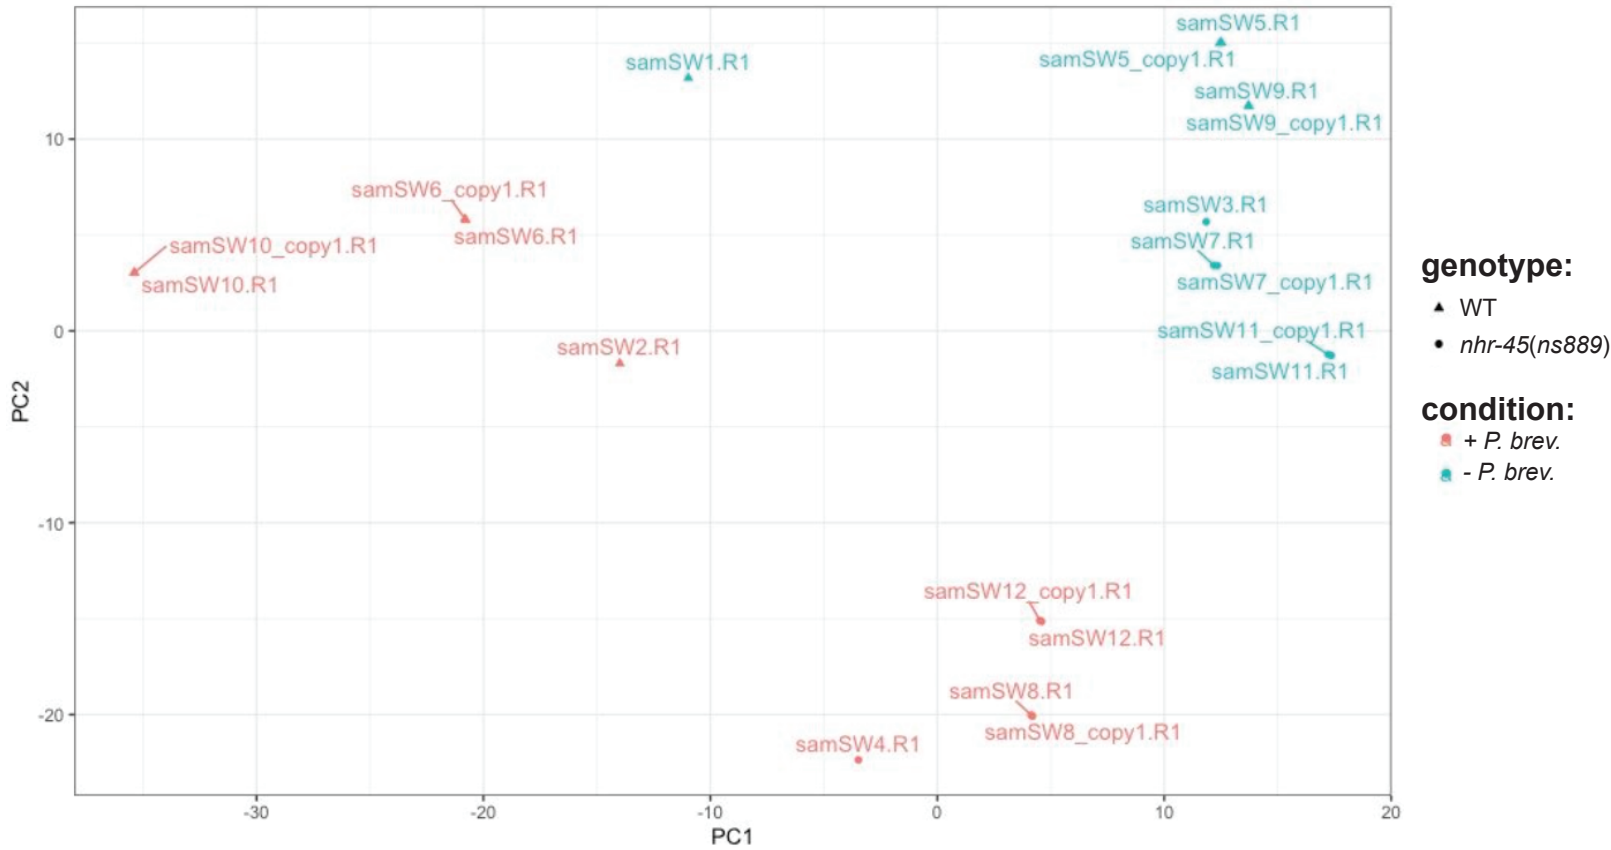**B**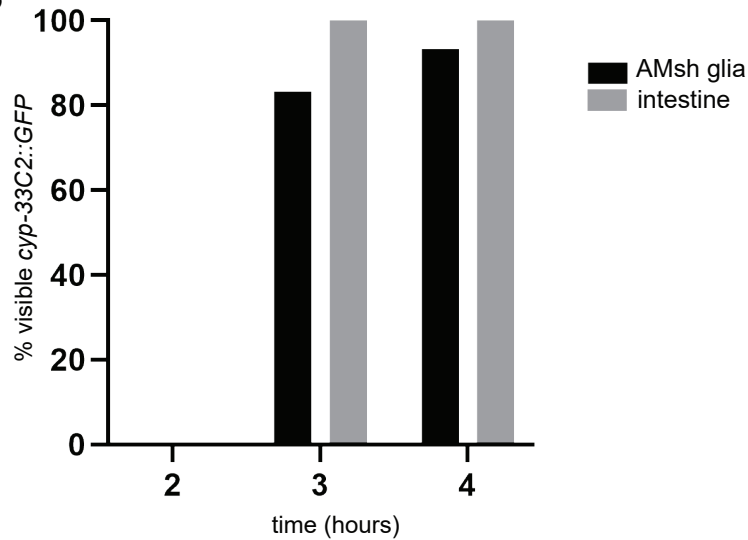

**Figure S1. Related to Figure 1.** (A) PCA analysis of RNAseq data. Genotypes and conditions for samples are as follows: samSW1, samSW5, samSW9 – WT without *P. brevicompactum* (3 replicates); samSW2, samSW6, samSW10 – WT with *P. brevicompactum* (3 replicates); samSW3, samSW7, samSW11 – *nhr-45(ns889); nsls910* without *P. brevicompactum* (3 replicates); samSW4, samSW8, samSW12 – *nhr-45(ns889); nsls910* with *P. brevicompactum* (3 replicates). ‘copy’ indicates that a sample was sequenced twice to increase the number of reads. (B) Induction of *cyp-33C2::GFP* in young adults acutely exposed to *P. brevicompactum*.

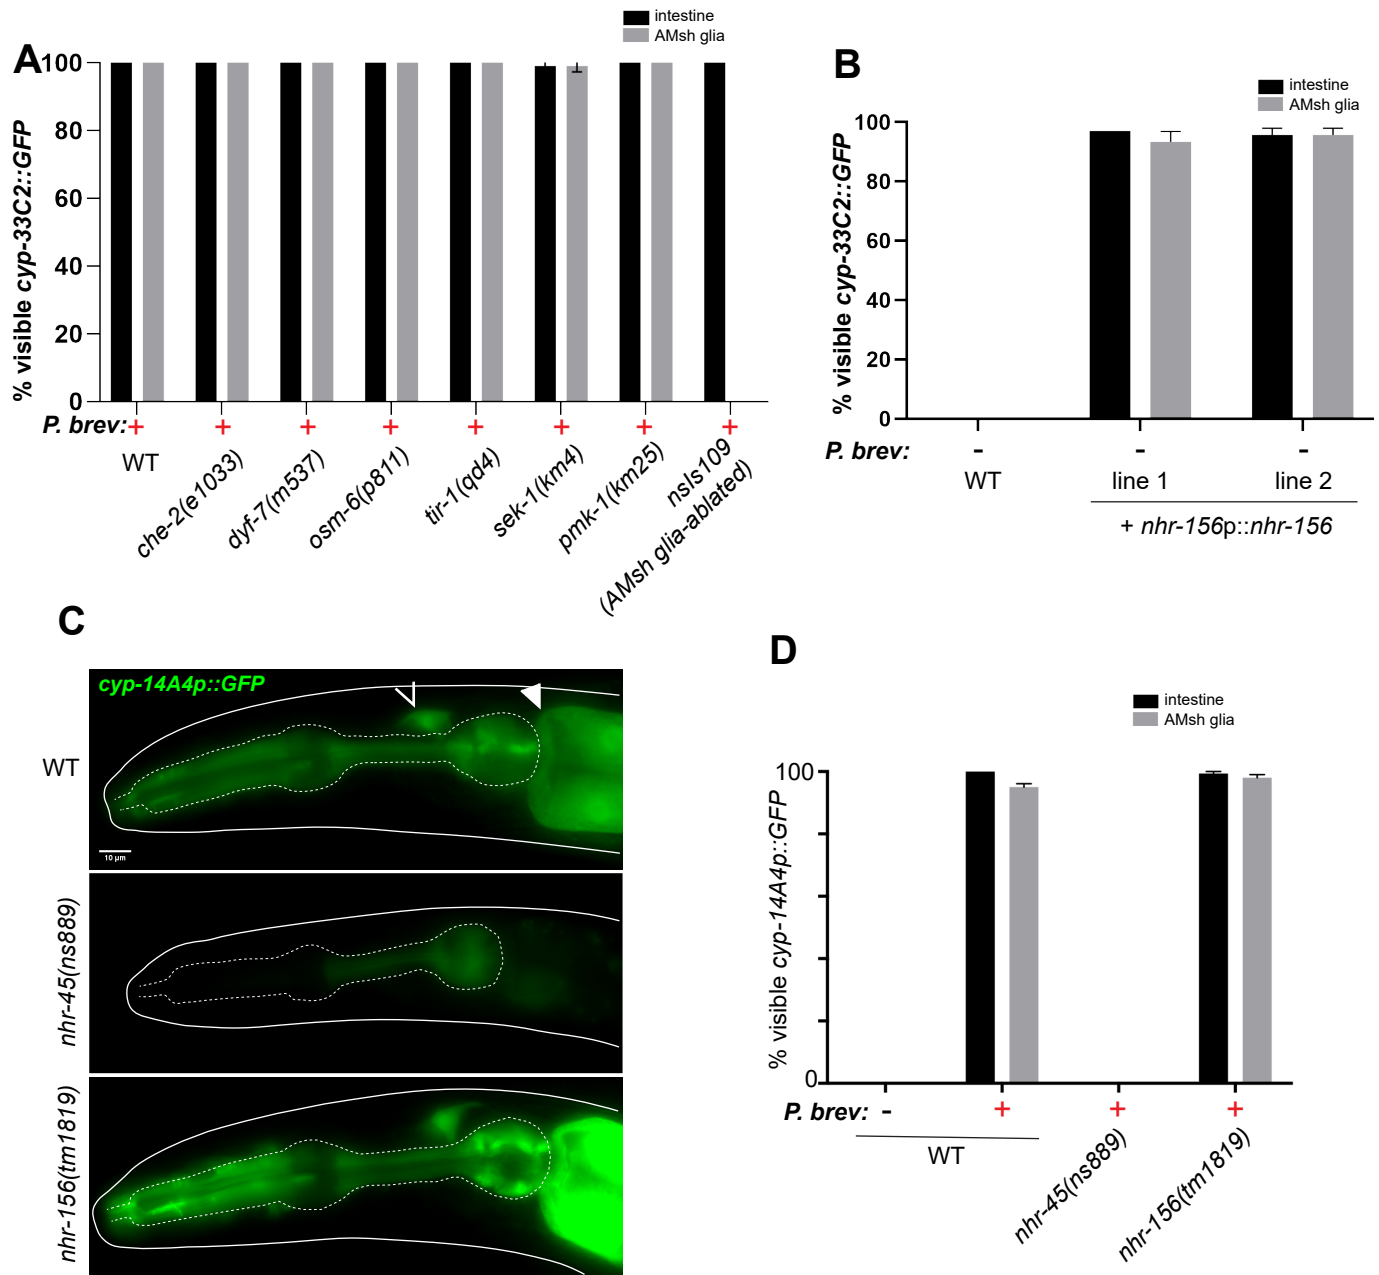

**Figure S2. Related to Figure 2.** (A) *cyp-33C2::GFP* induction following *P. brevicompactum* exposure in the indicated mutant strains. (B) Basal *cyp-33C2::GFP* expression in the indicated strains. (C) *cyp-14A4p::GFP* induction following *P. brevicompactum* exposure. Open arrowhead, AMsh glia. Closed arrowhead, intestine. (D) Quantification of mutant strains from (C).

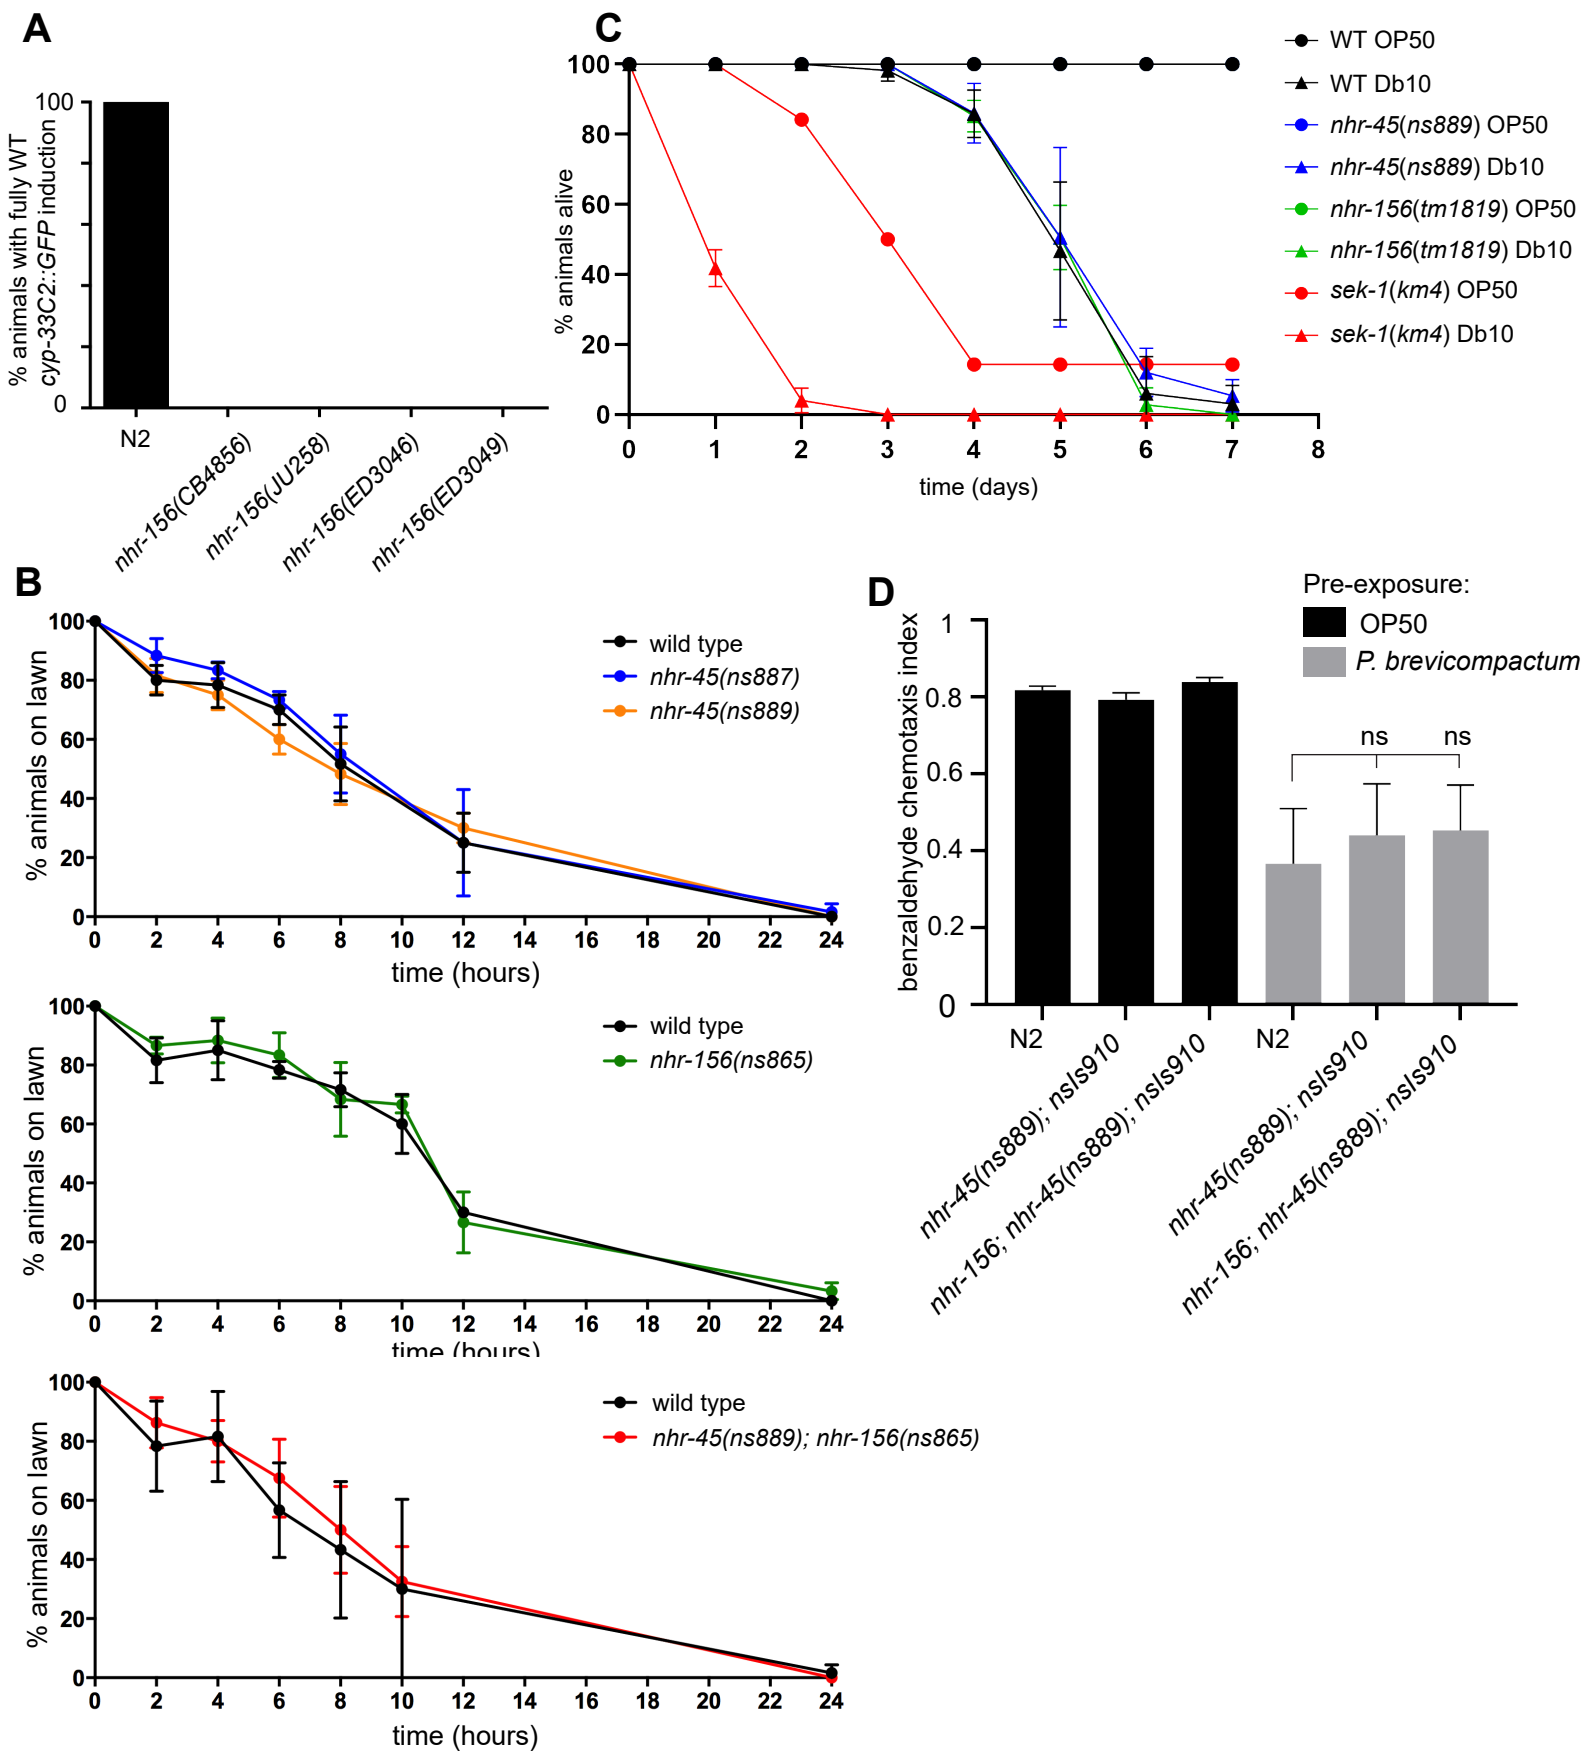

**Figure S3. Related to Figure 4.** (A) *cyp-33C2::GFP* induction by *Serratia marcescens* Db10 in AMsh glia was quantified by scoring the percentage of animals that show fully wild-type levels of expression. Genotypes refer to representative F2 recombinant lines that were generated by crossing *cyp-33C2::GFP* from N2 into the indicated isolates. (B) *Serratia marcescens* Db10 lawn-leaving assays for the indicated genotypes. (C) *Serratia marcescens* Db10 killing assays for the indicated genotypes. (D) Effect of pre-exposure to *P. brevicompactum* on benzaldehyde chemotaxis. *nsls910*, *elt-2p::nhr-45* (used to rescue the toxicity phenotype observed when *nhr-45* mutants are grown in the presence of *P. brevicompactum*).
